# Supplementary material for: Unveiling the correlation between the thickness and uniformity of the hydroxyethyl cellulose film and its protective effect on the zinc electrode
Source: Royal Society of Chemistry journal article supplement (doi:10.1039/d4ta00041b), 2024-01-01
Supplement: d4ta00041b1.pdf [file d4ta00041b1.pdf]

## Electronic Supplementary Information

### **Unveiling the correlation between the thickness and uniformity of hydroxyethyl cellulose film and its protective efficiency on zinc electrode**

Sheng Lu<sup>a</sup>, Biao Jiang<sup>b</sup>, Li Zhang<sup>a</sup>, Wei Xia<sup>a</sup>, Yu Gao<sup>a</sup>, Liang Wu<sup>c</sup>, Dongqing Wu<sup>c,\*</sup>, Han Wang<sup>a,\*</sup>

a. School of Chemistry and Chemical Engineering, Shanghai University of Engineering Sciences, 333 Longteng Road, Shanghai, 201620 P. R. China. Email: wanghan@sues.edu.cn

b. Department of Electronic Engineering, Shanghai Jiao Tong University, 800 Dongchuan Road, Shanghai 200240 P. R. China.

c. School of Chemistry and Chemical Engineering, Shanghai Jiao Tong University, 800 Dongchuan Road, Shanghai, 200240 P. R. China. Email: wudongqing@sjtu.edu.cn

### *Reasons for the selection of HEC*

In this study, we chose hydroxyethyl cellulose (HEC) with moderate molecular weight to construct the solid electrolyte layer (SEI) for zinc metal electrodes with the following concerns: As a modified cellulose, HEC exhibits better dispersibility in aqueous solutions compared to natural cellulose, making it suitable for preparing thin films from aqueous solutions. HEC contains abundant hydroxyl and ether groups, resulting in its solution having excellent viscosity. These characteristics enhance the adhesion between HEC film and zinc surface, and effectively inhibit the dispersion of HEC in aqueous electrolytes. Based on these reasons, the HEC Natrosol 250HBR (Ashland Company) was used in this work. It has good quality to ensure the repeatability of our results. The molecular weight of Natrosol 250HBR is about 1000000, allowing it to have a good solution processing capability in aqueous solution. At the same time, such a molecular weight can avoid the re-dispersion of SEI in the aqueous electrolyte.

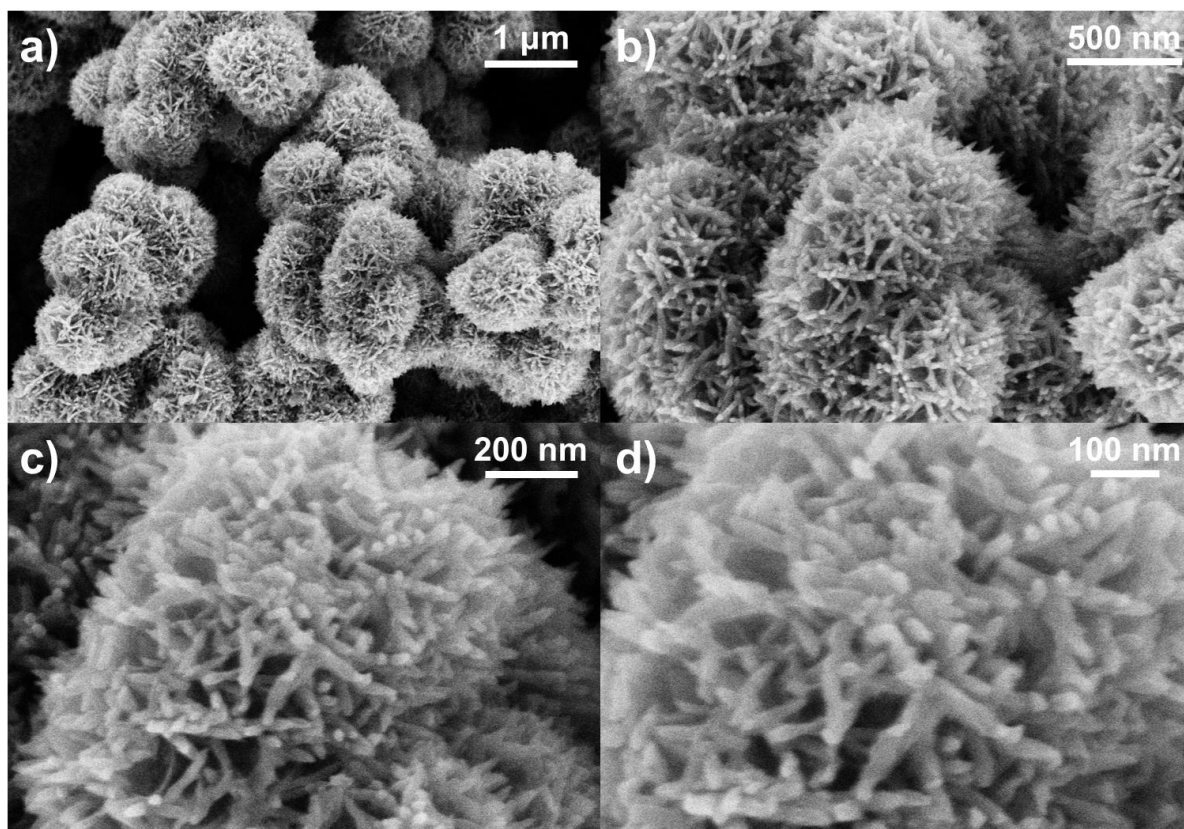

**Figure S1.** SEM images of  $\alpha$ -MnO<sub>2</sub> at different scales.

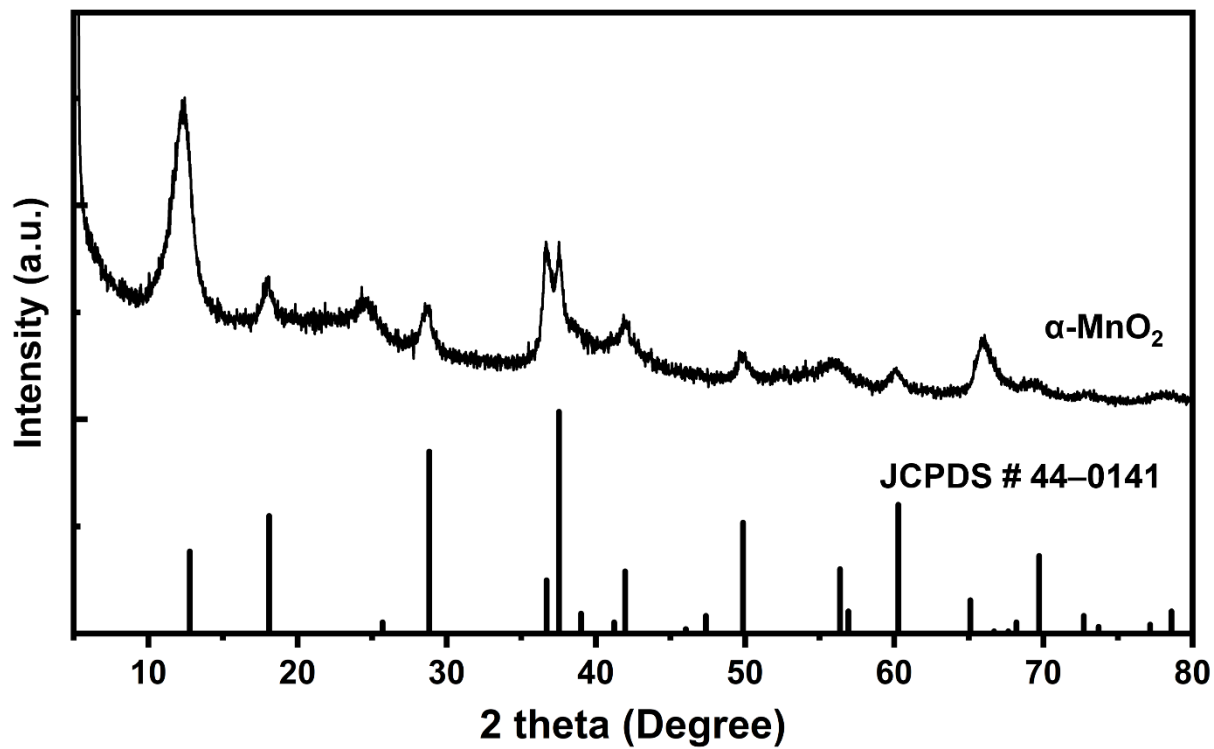

Figure S2. XRD patterns of  $\alpha$ -MnO<sub>2</sub> in this work.

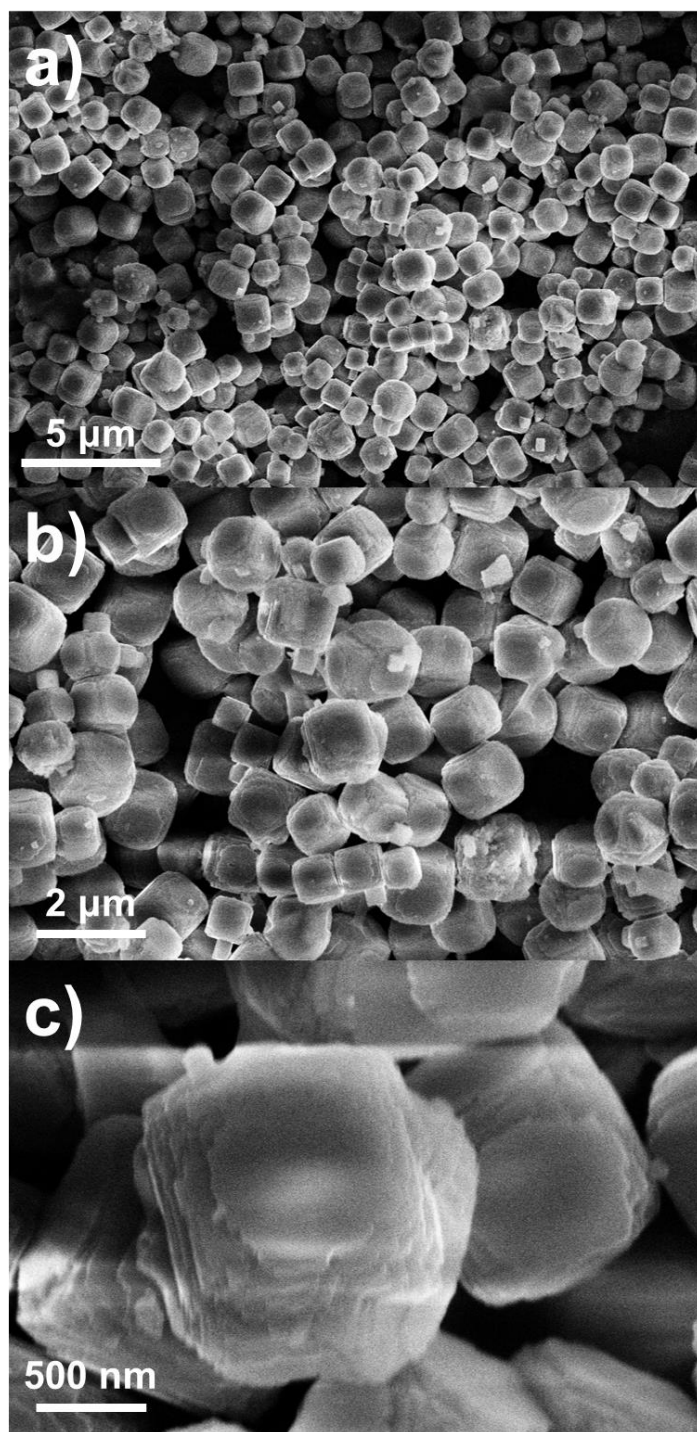

**Figure S3.** SEM images of PBAs at different scales.

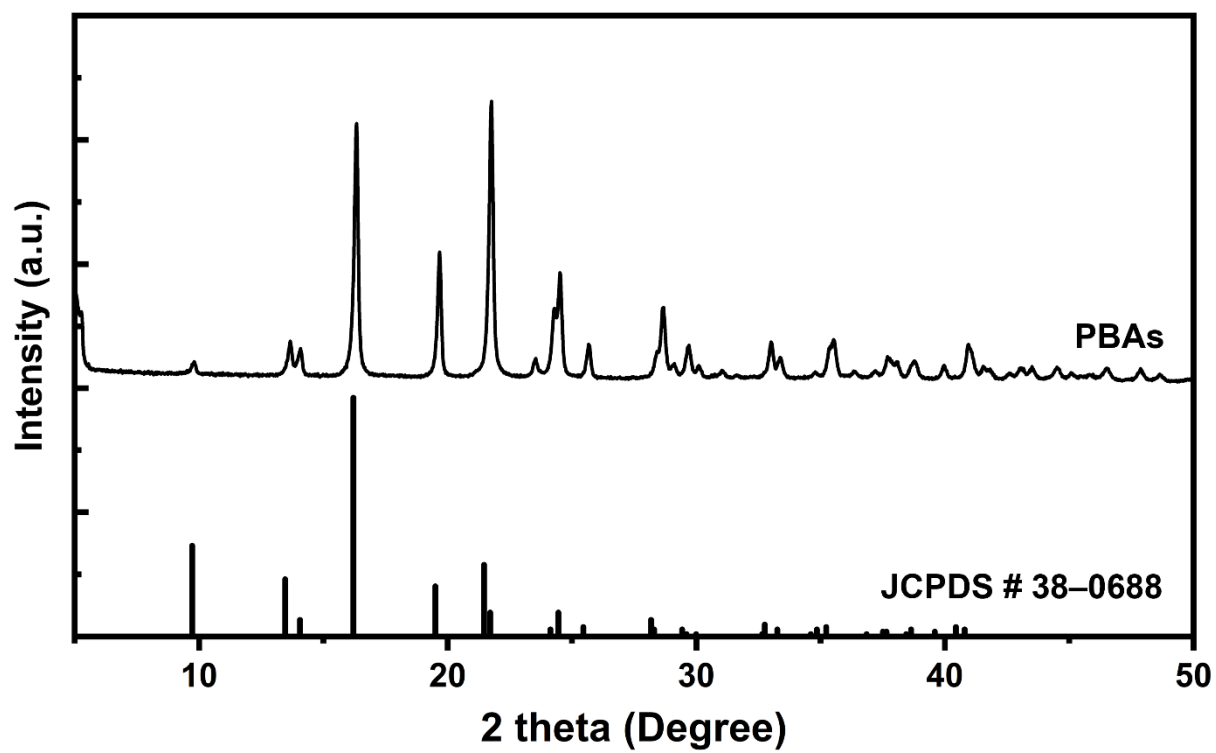

Figure S4. The XRD patterns of PBAs.

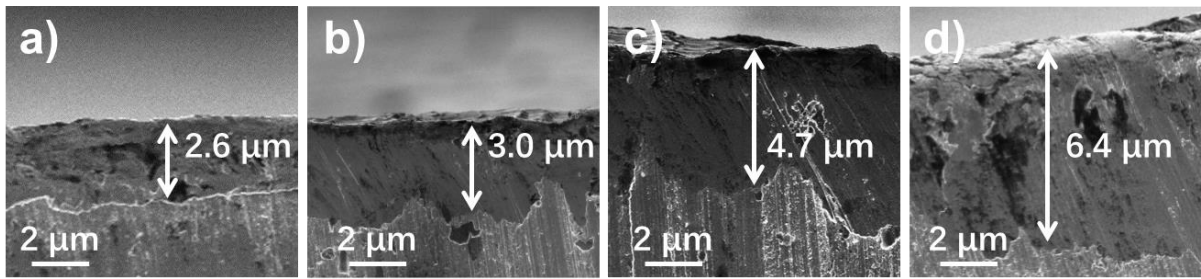

**Figure S5.** Cross-sectional SEM images of a) 0.5% HEC@Zn, b) 1.0% HEC@Zn, c) 1.5% HEC@Zn, and d) 2.0% HEC@Zn.

**Table S1.** The thickness of the HEC film on Zn foil

| Sample      | Thickness ( $\mu\text{m}$ ) | Concentration of the HEC solution (wt.%) |
|-------------|-----------------------------|------------------------------------------|
| 0.5% HEC@Zn | 2.7                         | 0.5                                      |
| 1.0% HEC@Zn | 3.1                         | 1.0                                      |
| 1.5% HEC@Zn | 4.5                         | 1.5                                      |
| 2.0% HEC@Zn | 6.0                         | 2.0                                      |
| 2.5% HEC@Zn | 15.0                        | 2.5                                      |



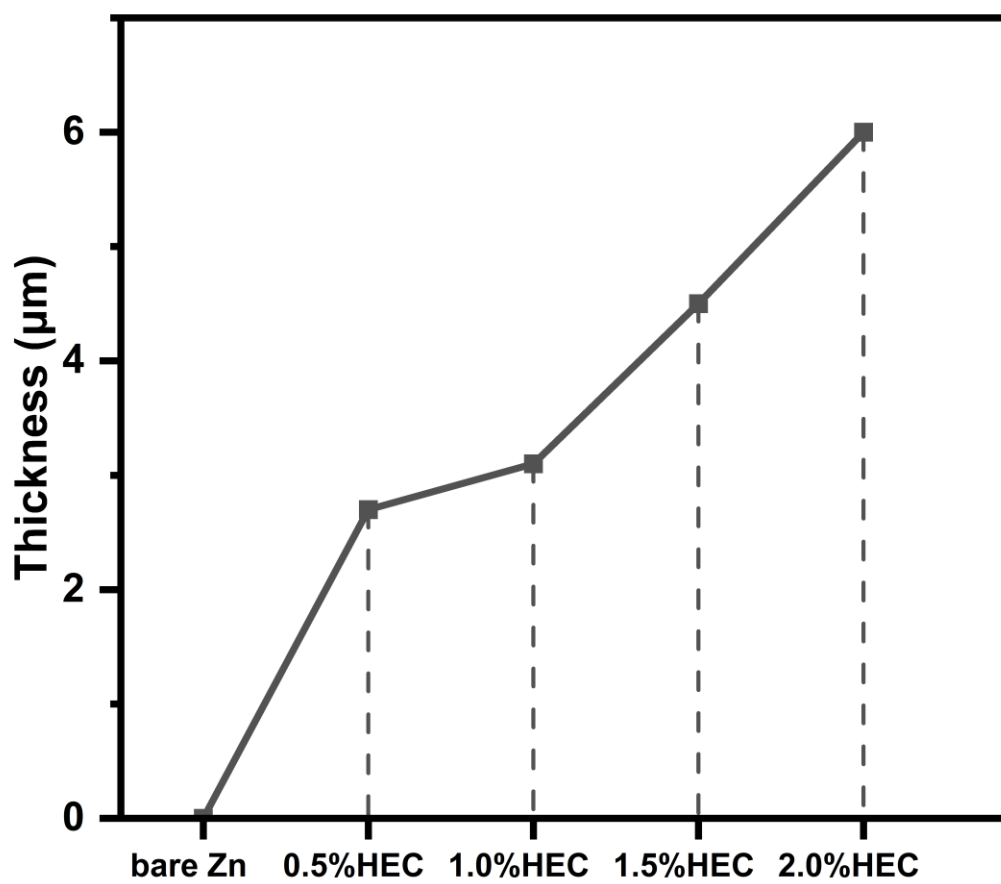

Figure S6. Thicknesses of the HEC films on Zn foils

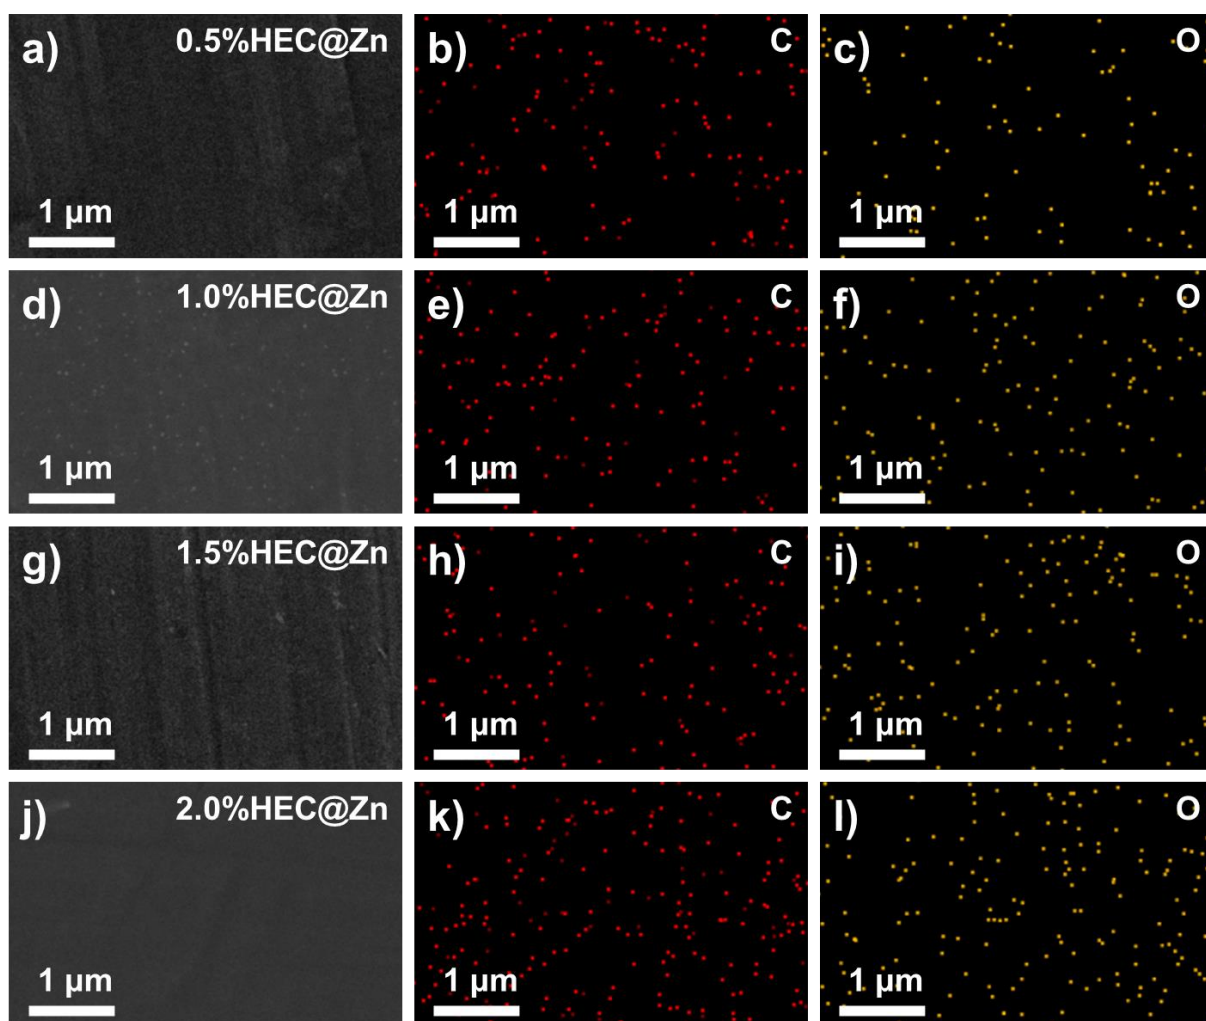

**Figure S7.** EDS mapping images of (a-c) 0.5% HEC@Zn, (d-f) 1.0% HEC@Zn, (g-i) 1.5% HEC@Zn, and (j-l) 2.0% HEC@Zn.

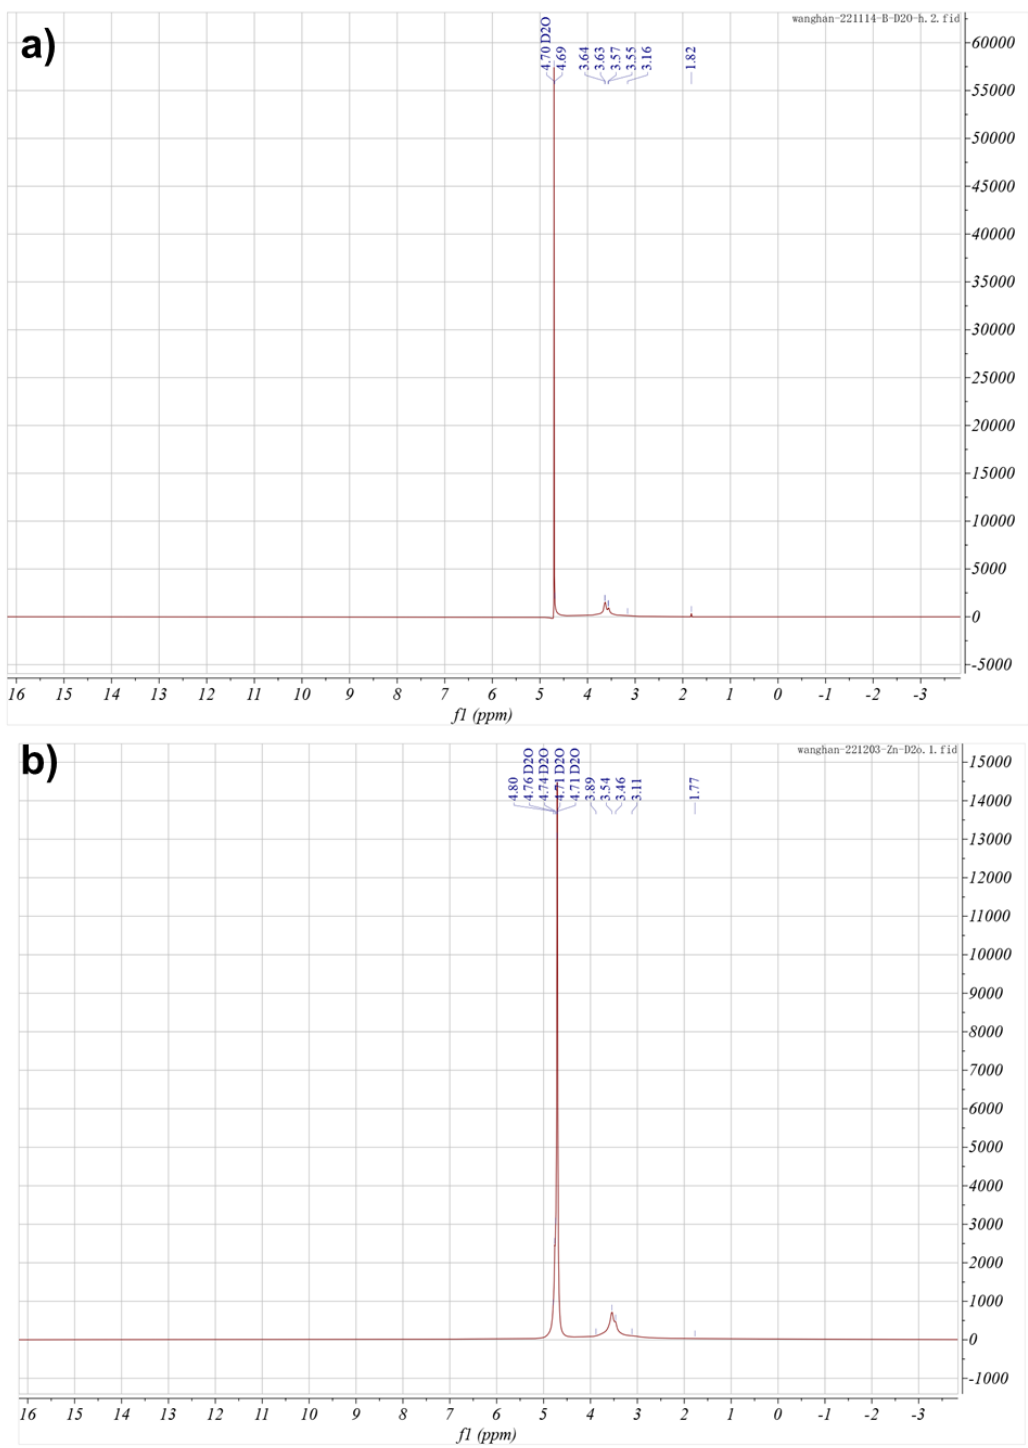

**Figure S8.** <sup>1</sup>H-NMR spectra of 2.0 wt.% HEC aqueous solution (a) before and (b) after the addition of ZnSO<sub>4</sub>.

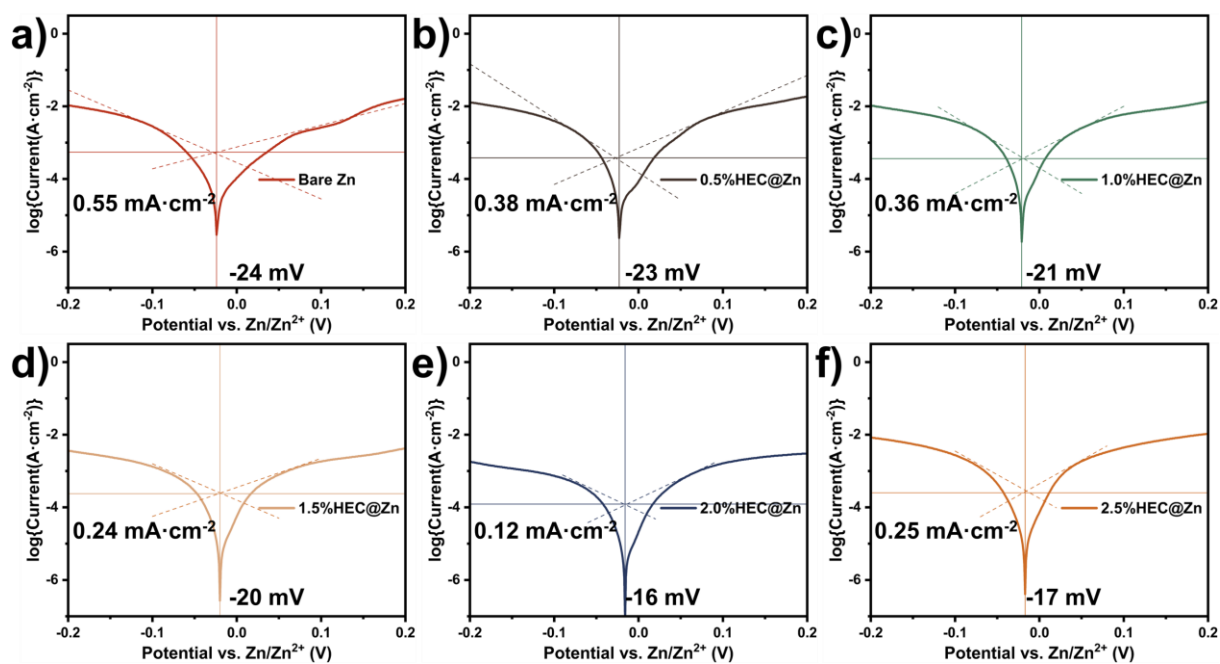

**Figure S9.** Hydrogen evolution current density for the symmetric cells with (a) bare Zn, (b) 0.5% HEC@Zn, (c) 1.0% HEC@Zn, (d) 1.5% HEC@Zn, (e) 2.0% HEC@Zn, and (f) 2.5% HEC@Zn as the electrodes.

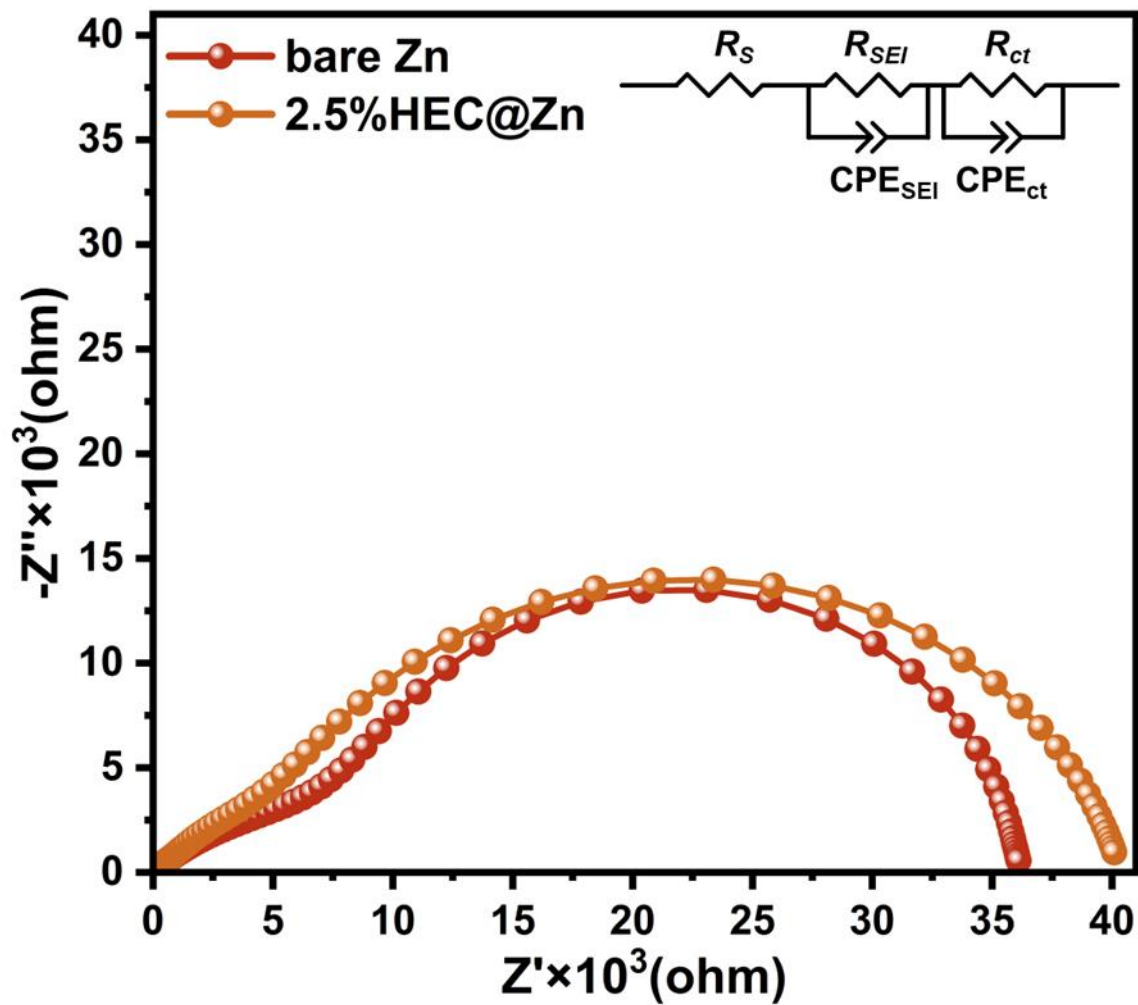

**Figure S10.** Nyquist plots of the symmetric cells with bare Zn and 2.5% HEC@Zn as electrodes (Inset: the equivalent circuit of the symmetric cells).

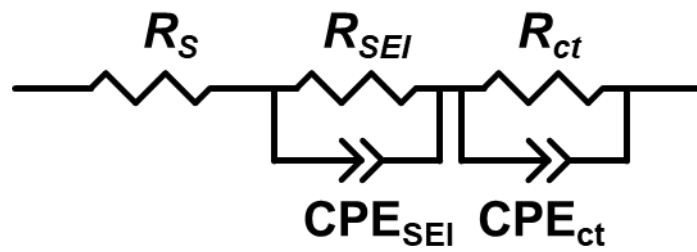

**Figure S11.** The equivalent circuit of the symmetric cells fitted.

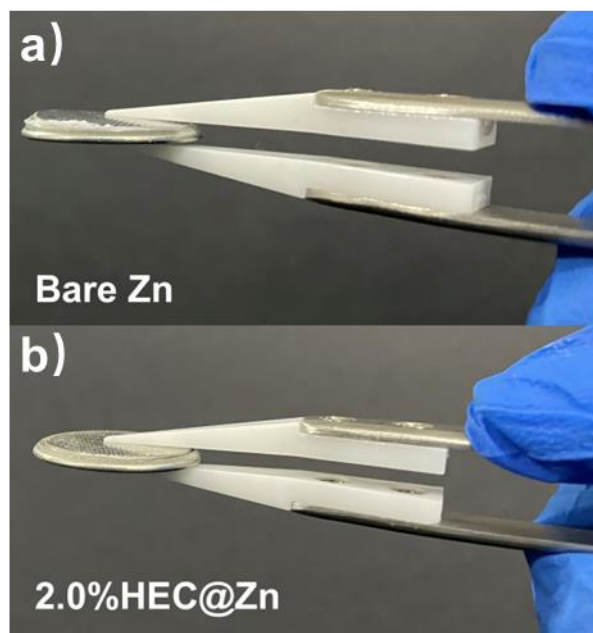

**Figure S12.** Digital images of the symmetric cells with (a) bare Zn and (b) 2.0% HEC@Zn as the electrodes after the cycling tests.

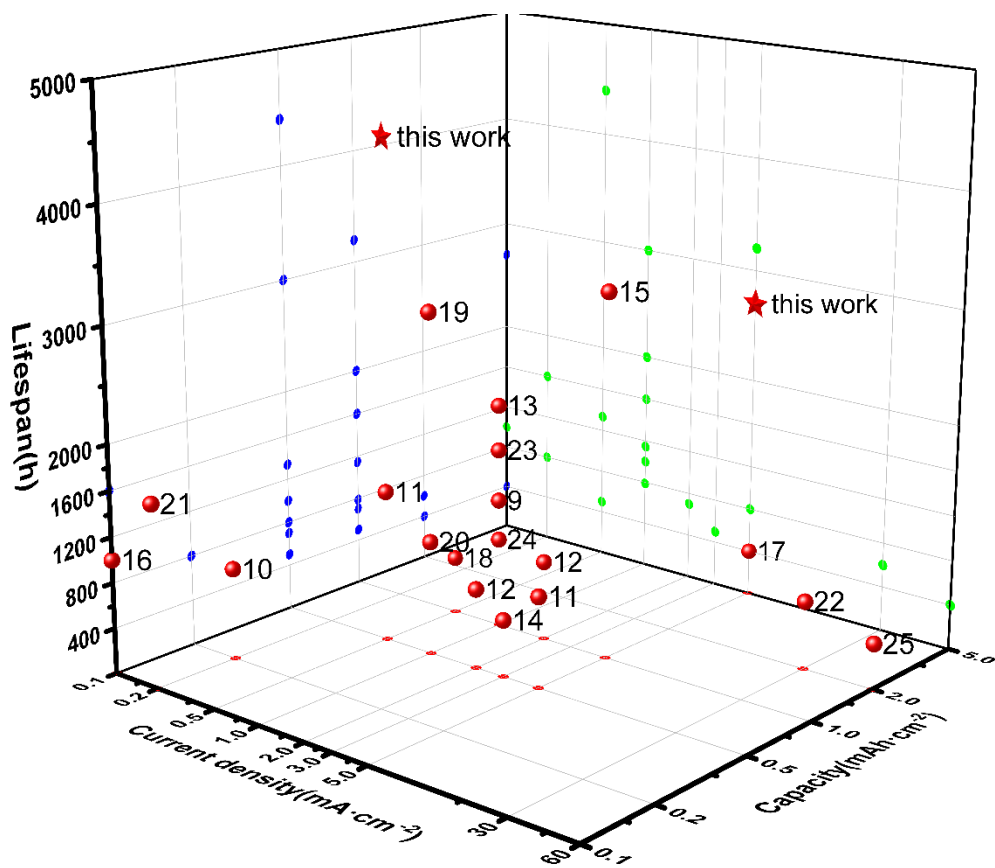

**Figure S13.** Comparison of the cyclic stabilities of the symmetric cells in this work with the recently reported Zn electrode protection strategies.



**Table S2** Comparison of the performances of the symmetrical cells in this work with the recent reports.

| Sample name              | Current density (mA cm <sup>-2</sup> ) | Capacity (mAh cm <sup>-2</sup> ) | Lifespan (h) | Ref.      |
|--------------------------|----------------------------------------|----------------------------------|--------------|-----------|
| PANZ@Zn                  | 1                                      | 1                                | 1145         | 1         |
| MZn-60                   | 0.2                                    | 0.2                              | 800          | 2         |
| 68E                      | 0.5                                    | 0.5                              | 1334         | 3         |
|                          | 5                                      | 0.5                              | 800          |           |
| Zn@Zn-Mont               | 2                                      | 0.5                              | 700          | 4         |
|                          | 2                                      | 1                                | 700          |           |
| Zn-TSA@Zn                | 1                                      | 1                                | 2000         | 5         |
| MOF-PVDF-Coated Zn       | 3                                      | 0.5                              | 500          | 6         |
| MOF-CeO <sub>2</sub> @Zn | 5                                      | 1                                | 3200         | 7         |
| Zn@NGDY                  | 0.1                                    | 0.1                              | 1000         | 8         |
| PSN-Zn                   | 5                                      | 5                                | 400          | 9         |
| Zn@ZnF <sub>2</sub>      | 0.5                                    | 1                                | 500          | 10        |
| PPZ@Zn                   | 1                                      | 0.5                              | 3000         | 11        |
| AA/DMSO@Zn               | 1                                      | 0.5                              | 1000         | 12        |
| MB@Zn                    | 0.2                                    | 0.1                              | 1600         | 13        |
| ZnTA@Zn                  | 30                                     | 2                                | 600          | 14        |
| SEI-Zn                   | 1                                      | 1                                | 1600         | 15        |
| LM-Zn                    | 1                                      | 1                                | 788          | 16        |
| Zn@ZBO                   | 60                                     | 2                                | 400          | 17        |
| 2.0% HEC@Zn              | 5                                      | 5                                | 2700         | This work |

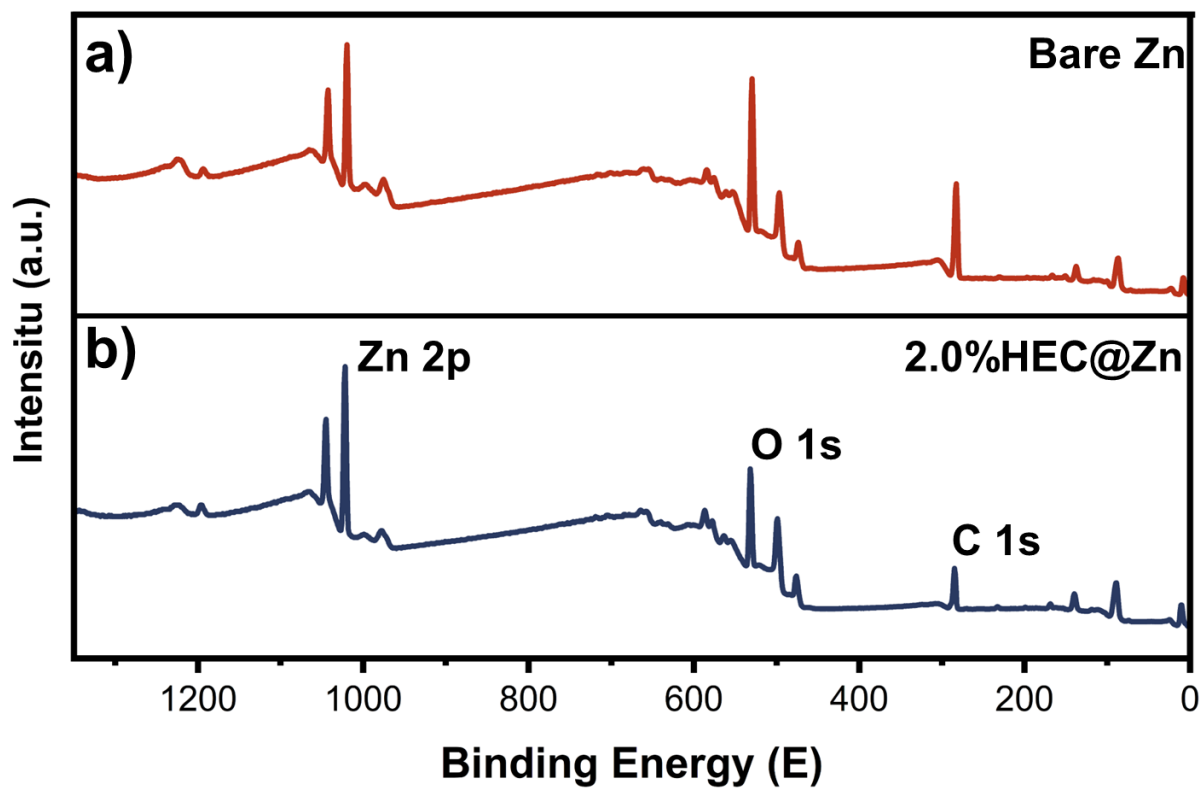

**Figure S14.** The full scale XPS spectra of bare Zn foil (a) and 2.0% HEC@Zn (b) after plating/stripping.

**Table S3** the information for the peak at each binding energy of bare Zn and 2.0%HEC@Zn.

|      |                    | bare Zn                 |                      | 2.0% HEC@Zn             |                      |       |
|------|--------------------|-------------------------|----------------------|-------------------------|----------------------|-------|
| C1s  | binding energy(eV) | 284.7                   | 288.9                | 284.8                   | 286.3                | 288.4 |
|      | Area (CPS*eV)      | 156191.8                | 11552.8              | 113045.8                | 91498.8              | 16901 |
|      | peak identify      | C-C/C-H                 | C=O                  | C-C/C-H                 | C-O                  | C=O   |
| O1s  | binding energy(eV) | 531.7                   |                      | 531.6                   | 532.5                |       |
|      | Area (CPS*eV)      | 391519.9                |                      | 131532.5                | 212671.4             |       |
|      | peak identify      | ZnO/Zn(OH) <sub>2</sub> |                      | ZnO/Zn(OH) <sub>2</sub> | Organic O            |       |
| Zn2p | binding energy(eV) | 1022.3                  | 1045.2               | 1022                    | 1045.1               |       |
|      | Area (CPS*eV)      | 807233.7                | 409814.7             | 440388.8                | 256541.7             |       |
|      | peak identify      | Zn 2p <sub>3/2</sub>    | Zn 2p <sub>1/2</sub> | Zn 2p <sub>3/2</sub>    | Zn 2p <sub>1/2</sub> |       |

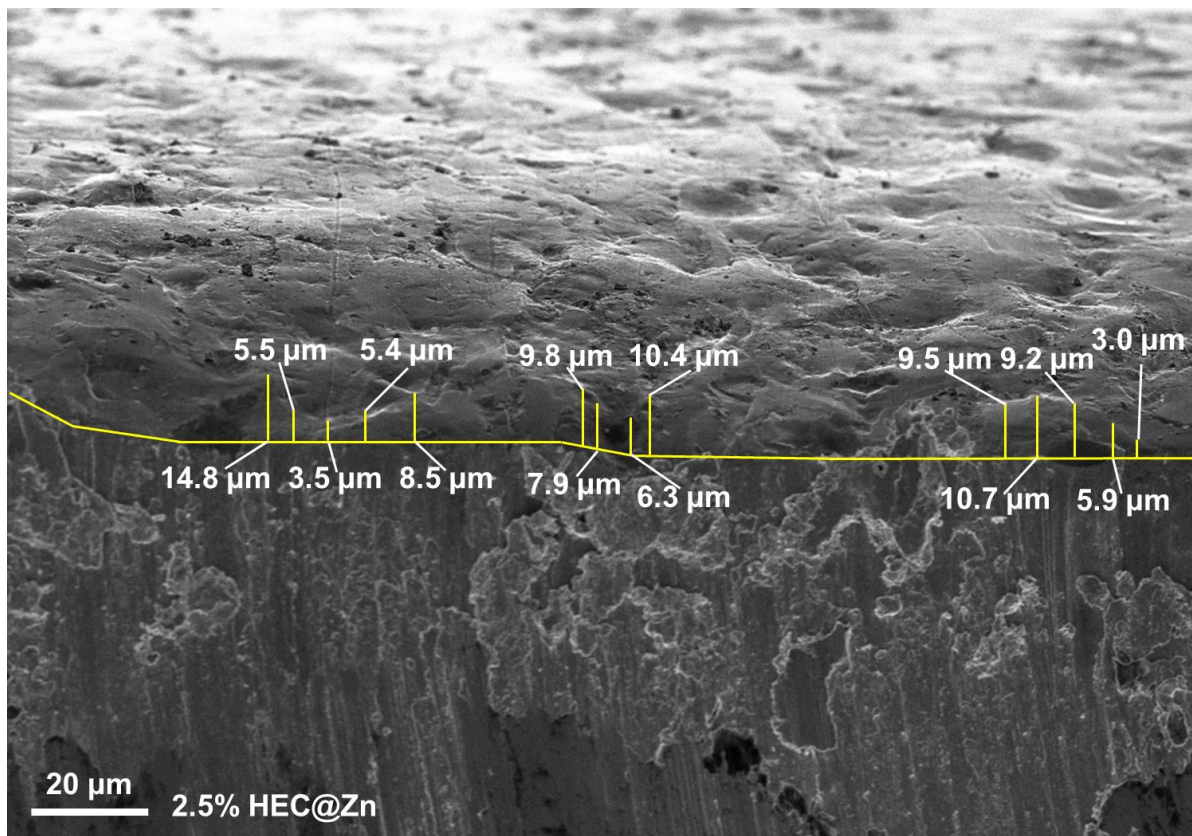

**Figure S15.** SEM image of 2.5% HEC@Zn. The region below the yellow line is Zn, while the region above the yellow line is the HEC coating. In the image, the thickness changes of uneven several areas on the surface is measured to illustrate the thinnest thickness of 2.5% HEC@Zn.

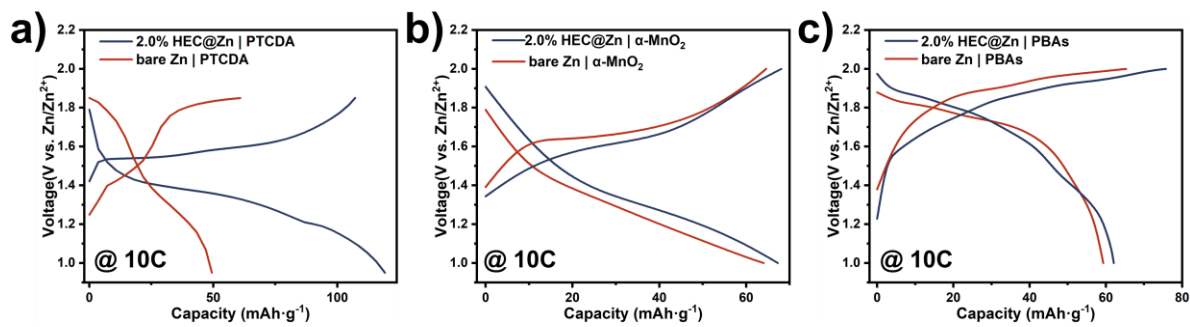

**Figure S16.** GCD curves of the cells consist of 2.0% HEC@Zn or bare Zn and PTCDA (a),  $\alpha$ -MnO<sub>2</sub> (b) or PBAs (c).

**Table S4** Comparison of the performances of the AZIBs in this work with the recent reports.

| Electrode                | Cathode                       | Current density<br>(A g <sup>-1</sup> ) | Charge/discharge rate<br>(C) | Lifespan<br>(cycles) | Ref.      |
|--------------------------|-------------------------------|-----------------------------------------|------------------------------|----------------------|-----------|
| 68E                      | ZnVO                          | 0.5                                     | \                            | 500                  | 3         |
| Zn@Zn-Mont               | MnO <sub>2</sub>              | \                                       | 2                            | 1000                 | 4         |
| Zn-TSA@Zn                | V <sub>2</sub> O <sub>5</sub> | 2                                       | \                            | 1500                 | 5         |
| PVB@Zn                   | MnO <sub>2</sub>              | \                                       | 5                            | 1500                 | 18        |
| ILG-Zn                   | MnO <sub>2</sub>              | \                                       | 2                            | 600                  | 19        |
| FCOF-Zn                  | MnO <sub>2</sub>              | \                                       | 3                            | 1000                 | 9         |
| AEC-Zn                   | MnO <sub>2</sub>              | \                                       | 2                            | 300                  | 20        |
| SEI                      | MnO <sub>2</sub>              | \                                       | 10                           | 700                  | 21        |
| PDMS/TiO <sub>2</sub> -x | MnO <sub>2</sub>              | \                                       | 1                            | 400                  | 22        |
| PSN-Zn                   | MnO <sub>2</sub>              | 0.3                                     | \                            | 100                  | 23        |
| PANZ-Zn                  | MnVO                          | 0.5                                     | \                            | 1050                 | 1         |
| Zn@ZnF <sub>2</sub>      | MnO <sub>2</sub>              | 0.5                                     | \                            | 250                  | 10        |
| ZCS-Zn                   | MnO <sub>2</sub>              | 5                                       | \                            | 600                  | 24        |
| Zn@SIP                   | MnO <sub>2</sub>              | 2                                       | \                            | 1200                 | 25        |
| AA/DMSO@Zn               | NaVO                          | 2                                       | \                            | 2000                 | 12        |
| MB@Zn                    | MnO <sub>2</sub>              | 0.5                                     | \                            | 200                  | 13        |
| SEI-Zn                   | MVO                           | 5                                       | \                            | 800                  | 15        |
| LM-Zn                    | MnO <sub>2</sub>              | 1                                       | \                            | 1000                 | 16        |
| Zn@ZBO                   | MnO <sub>2</sub>              | \                                       | 10                           | 2000                 | 17        |
|                          | $\alpha$ -MnO <sub>2</sub>    | 3                                       | 10                           | 10000                |           |
| 2.0% HEC@Zn              | PTCDA                         | 1.3                                     | 10                           | 10000                | This work |
|                          | PBA <sub>s</sub>              | 1.7                                     | 10                           | 1300                 |           |

## References

1. P. Chen, X. Yuan, Y. Xia, Y. Zhang, L. Fu, L. Liu, N. Yu, Q. Huang, B. Wang, X. Hu, Y. Wu and T. van Ree, *Adv. Sci.*, 2021, **8**, 2100309.
2. N. Zhang, S. Huang, Z. Yuan, J. Zhu, Z. Zhao and Z. Niu, *Angew. Chem.-Int. Edit.*, 2021, **60**, 2861-2865.
3. R. Qin, Y. Wang, M. Zhang, Y. Wang, S. Ding, A. Song, H. Yi, L. Yang, Y. Song, Y. Cui, J. Liu, Z. Wang, S. Li, Q. Zhao and F. Pan, *Nano Energy*, 2021, **80**, 105478.
4. L. Hong, X. Wu, C. Ma, W. Huang, Y. Zhou, K.-X. Wang and J.-S. Chen, *J. Mater. Chem. A*, 2021, **9**, 16814-16823.
5. Z. Tao, Y. Zhu, Z. Zhou, A. Wang, Y. Tan, Z. Chen, M. Yu and Y. Yang, *Small*, 2022, **18**, 2107971.
6. M. Liu, L. Yang, H. Liu, A. Amine, Q. Zhao, Y. Song, J. Yang, K. Wang and F. Pan, *ACS Appl. Mater. Interfaces*, 2019, **11**, 32046-32051.
7. P. Li, J. Ren, C. Li, J. Li, K. Zhang, T. Wu, B. Li and L. Wang, *Chem. Eng. J.*, 2023, **451**, 138769.
8. A. Naveed, H. Yang, Y. Shao, J. Yang, N. Yanna, J. Liu, S. Shi, L. Zhang, A. Ye, B. He and J. Wang, *Adv. Mater.*, 2019, **31**, 1900668.
9. Z. Zhao, R. Wang, C. Peng, W. Chen, T. Wu, B. Hu, W. Weng, Y. Yao, J. Zeng, Z. Chen, P. Liu, Y. Liu, G. Li, J. Guo, H. Lu and Z. Guo, *Nat. Commun.*, 2021, **12**, 6606.
10. Y. Yang, C. Liu, Z. Lv, H. Yang, Y. Zhang, M. Ye, L. Chen, J. Zhao and C. C. Li, *Adv. Mater.*, 2021, **33**, 2007388.
11. X. Wang, J. Meng, X. Lin, Y. Yang, S. Zhou, Y. Wang and A. Pan, *Adv. Funct. Mater.*, 2021, **31**, 2106114.
12. C. Huang, W. Deng, X. Yuan, Y. Zhou, C. Li, J. Hu, M. Zhang, J. Zhu and R. Li, *ACS Appl. Mater. Interfaces*, 2023, **15**, 2341-2350.
13. T. Huang, K. Xu, N. Jia, L. Yang, H. Liu, J. Zhu and Q. Yan, *Adv. Mater.*, 2023, **35**, 2205206.
14. P.-F. Zhang, Z. Wu, S.-J. Zhang, L.-Y. Liu, Y. Tian, Y. Dou, Z. Lin and S. Zhang, *Nano Energy*, 2022, **102**, 107721.
15. N. Wang, Y. Zhang, J. Yuan, L. Hu, M. Sun, Z. Li, X. Yao, X. Weng and C. Jia, *ACS Appl. Mater. Interfaces*, 2022, **14**, 48081-48090.
16. C. Liu, Z. Li, X. Zhang, W. Xu, W. Chen, K. Zhao, Y. Wang, S. Hong, Q. Wu, M.-C. Li and C. Mei, *Adv. Sci.*, 2022, **9**, 2202380.
17. D. Wang, H. Liu, D. Lv, C. Wang, J. Yang and Y. Qian, *Adv. Mater.*, 2023, **35**, 2207908.

18. J. Hao, X. Li, S. Zhang, F. Yang, X. Zeng, S. Zhang, G. Bo, C. Wang and Z. Guo, *Adv. Funct. Mater.*, 2020, **30**, 2001263.
19. D. Lee, H.-I. Kim, W.-Y. Kim, S.-K. Cho, K. Baek, K. Jeong, D. B. Ahn, S. Park, S. J. Kang and S.-Y. Lee, *Adv. Funct. Mater.*, 2021, **31**, 2103850.
20. R. Zhao, Y. Yang, G. Liu, R. Zhu, J. Huang, Z. Chen, Z. Gao, X. Chen and L. Qie, *Adv. Funct. Mater.*, 2021, **31**, 2001867.
21. D. Li, L. Cao, T. Deng, S. Liu and C. Wang, *Angew. Chem.-Int. Edit.*, 2021, **60**, 13035-13041.
22. Z. Guo, L. Fan, C. Zhao, A. Chen, N. Liu, Y. Zhang and N. Zhang, *Adv. Mater.*, 2022, **34**, 2105133.
23. S. Zhou, Y. Wang, H. Lu, Y. Zhang, C. Fu, I. Usman, Z. Liu, M. Feng, G. Fang, X. Cao, S. Liang and A. Pan, *Adv. Funct. Mater.*, 2021, **31**, 2104361.
24. Y. Chu, S. Zhang, S. Wu, Z. Hu, G. Cui and J. Luo, *Energy Environ. Sci.*, 2021, **14**, 3609-3620.
25. M. Zhao, J. Rong, F. Huo, Y. Lv, B. Yue, Y. Xiao, Y. Chen, G. Hou, J. Qiu and S. Chen, *Adv. Mater.*, 2022, **34**, 2203153.
